# Supplementary material for: Phase I/Ib study of olaparib and carboplatin in women with triple negative breast cancer
Source: PubMed Central journal article supplement (PMC5668030; doi:10.18632/oncotarget.16577), 2017-03-25
Supplement: oncotarget-08-79175-s001.pdf [file oncotarget-08-79175-s001.pdf]

# Phase I/Ib study of olaparib and carboplatin in women with triple negative breast cancer

## Supplementary Material

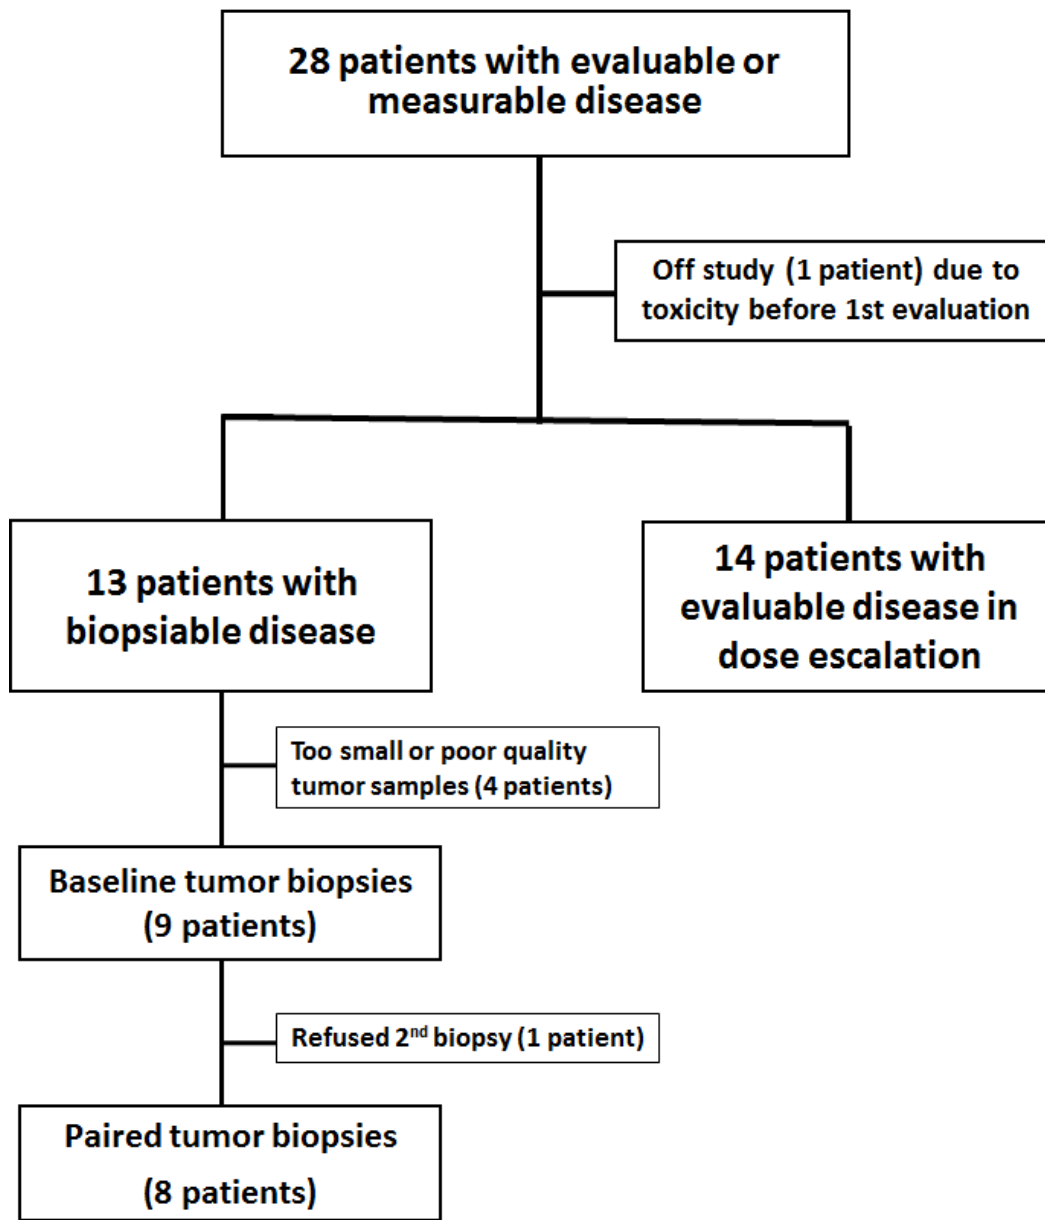

Supplementary Figure1: Consort diagram

## Supplementary Table 1

### 1A. Comparison of Initial Biopsy

|                 | <i>P-value</i> | <i>Mean</i><br>( <i>PFS</i> ≥ <i>4m</i> ) | <i>Mean</i><br>( <i>PFS</i> < <i>4m</i> ) | <i>t ratio</i> |
|-----------------|----------------|-------------------------------------------|-------------------------------------------|----------------|
| Cyclin_D1-R-V   | 0.000000e+000  | 10.8627                                   | 18.4622                                   | 22.6259        |
| Collagen VI-R-V | 1.901754e-031  | 5.1149                                    | 9.11149                                   | 11.8991        |
| Histone H3-R-V  | 4.585174e-007  | 3.94642                                   | 2.2462                                    | 5.06207        |
| YAP-R-E         | 6.465813e-007  | 3.10308                                   | 4.78084                                   | 4.9952         |

### 1B. Comparison of Change between pretreatment and post-cycle 1 treatment

|                 | <i>P-value</i> | <i>Mean</i><br>( <i>PFS</i> ≥ <i>4m</i> ) | <i>Mean</i><br>( <i>PFS</i> < <i>4m</i> ) | <i>t ratio</i> |
|-----------------|----------------|-------------------------------------------|-------------------------------------------|----------------|
| Cyclin_D1-R-V   | 0.000000e+000  | 7.55462                                   | -6.50367                                  | 14.0583        |
| Collagen VI-R-V | 3.658234e-028  | 1.85251                                   | -3.57806                                  | 5.43057        |
| Myosin-11-R-V   | 4.428060e-013  | 3.53862                                   | 0.0                                       | 3.53862        |
| YAP-R-E         | 3.968270e-007  | 0.90701                                   | -1.5611                                   | 2.46811        |
| Fibronectin-R-V | 0.00044133     | 1.74507                                   | 0.037842                                  | 1.70723        |
